# Supplementary material
Source: PubMed Central journal article supplement (PMC3525810)
Supplement: NIHMS410417-supplement-125_2012_2730_MOESM2_ESM.pdf [file NIHMS410417-supplement-125_2012_2730_MOESM2_ESM.pdf]

**ESM Table 1. Primer sequences for fine-mapping TCF7L2 association interval**

| <b>Region</b>  | <b>Forward (5' to 3')</b>  | <b>Reverse (5' to 3')</b> |
|----------------|----------------------------|---------------------------|
| 1              | GTGCTTAGACTTTGGGGTCAGA     | TCTGAAAACCTGCCTCTCAAGTTC  |
| 2              | ACTTGAGAGGCAGTTTTACAGAGCTA | GGAAAGTCTATTGACCAACACTGCT |
| 3              | ACCGTTGTTTTCTTTACACCTTCTG  | CCCTCACCCCATCTATTAGAAAATC |
| 4              | GTGGGGTAGATGAAATGTTGAGA    | AATCAGAGGCAGAATCCATAGGT   |
| 5              | AGAGGCTGCTACAGGGACAG       | AATAAAGACCCATTCTCCAGGTC   |
| 6              | GTATTTCTAACGTCCCCCTGACT    | TGTTGTCTGTCTAAACCAGCGTA   |
| 7              | CTCCATTATGAGGGTTGACTCAG    | TAGAGTAGTCCTCCCTCAAACC    |
| 8              | TTAGCTGGTAGGTTGGTTCTCAG    | ACCTCAAGCAAGTTCCCTAAAAG   |
| 9              | GAAGAAGTCAAAGTTCACCATCC    | CCATGATCCTTCTCTCACACAAC   |
| 10             | CTGTGTTTTGCACCCTCTTAAAACT  | ACACGCGTAGAGTAACAGAAGGAAG |
| 11             | GATCAGAACCCAAAACCTGAAATG   | AGTCTCCATAAAGGACAGAAGG    |
| 12             | CCTTTATGGGAGACTTCAACCTT    | TTCTTACATCACTTGTCCAC      |
| 13             | CACCGGAGAAGCACAAAGTATTA    | ACCTCAACAGTCAGTGATGGAAT   |
| 14             | AGCACTGCAAACAGAGTTACGTT    | GATACAATCCCTTGAGATGTTGC   |
| 15             | GGCCTTAGAGAAGTGACAGGTTT    | TATCCCTCTGCCTTTCTTCATGT   |
| 16             | AAGTTGGCTTCTCTCATTTAGG     | CCCTGTGACCTCAGTTTCTCTAC   |
| 17             | TACTTGCTGGCTTTGTACCTCTC    | CTCAGAAGGTTGGGTAGACTCTG   |
| 18             | CAGAGTCTACCCAACCTTCTGAG    | TATACAACACCAATGGCCTGAA    |
| 19             | GCAGGATCAGTCTGGCTTTAGTA    | TATCTGCGACAGGGTATTAGGTG   |
| 20             | GTAGATGGGTTTGACTCCATTTG    | AATTCCCTCTTCTTCACTTCACC   |
| 21             | CTTTTGTTTCTCTCGCCAGTAT     | TGGAACCTTGTGGCTAATGTCTCT  |
| 22             | TTATACAAGGCGTCAGTCTTTGC    | TCTAGCCTCCTACCTGATTTCT    |
| 23             | GAGAGCACCTCTTGGTTATTTAA    | AACACAAGCAGTAACAGGTTTGG   |
| 24             | CCCTTGAGGTGTAAGGAACTA      | TCTGCCAATCGGGATAATAAC     |
| 25             | ATCGTTACAGAACTGATGCCTTG    | CTTCTCACAACTGACCAGGAAG    |
| 26             | GTTTTATACCGGGTTTGGTGTC     | AGATGTAGAATGACGGTGTTTGC   |
| 27             | GCACTAGCAGGTGAGGAGTTAAA    | CTTCTGGTCTCTGGGTGAATATG   |
| 28             | GTTATCTGAGGCTGTCACCAGTC    | ATGGGTAGCTGGAACAAAGTCTC   |
| <b>SNP C/T</b> | AATTCATGGGCTTTCTCTGC       | GTGAAGTGCCCAAGCTTCTC      |
