# Supplementary material
Source: PubMed Central journal article supplement (PMC3525810)
Supplement: NIHMS410417-supplement-125_2012_2730_MOESM3_ESM.pdf [file NIHMS410417-supplement-125_2012_2730_MOESM3_ESM.pdf]

**Supplemental Table 2. Summary of luciferase assay results across cell lines**

| Rgn No. | HCT-116 |       | Neuro-2a |       | C2C12  |       | U2OS  |       | MIN6   |       | HepG2 |       |
|---------|---------|-------|----------|-------|--------|-------|-------|-------|--------|-------|-------|-------|
|         | AVE     | STDEV | AVE      | STDEV | AVE    | STDEV | AVE   | STDEV | AVE    | STDEV | AVE   | STDEV |
| 1       | 0.342   | 0.027 | 0.250    | 0.023 | 0.498  | 0.183 | 1.000 | 0.324 | 0.482  | 0.033 | 0.579 | 0.251 |
| 2       | 0.271   | 0.044 | 0.345    | 0.006 | 0.283  | 0.066 | 0.710 | 0.091 | 0.459  | 0.033 | 0.734 | 0.284 |
| 3       | 0.171   | 0.011 | 0.253    | 0.052 | 0.244  | 0.013 | 0.709 | 0.209 | 0.575  | 0.044 | 0.532 | 0.125 |
| 4       | 1.720   | 0.126 | 2.319    | 0.351 | 1.437  | 0.213 | 0.659 | 0.085 | 1.130  | 0.168 | 0.885 | 0.291 |
| 5       | 6.256   | 1.146 | 17.630   | 1.653 | 13.690 | 4.887 | 2.716 | 0.936 | 1.392  | 0.214 | 1.034 | 0.257 |
| 6       | 0.244   | 0.019 | 0.705    | 0.127 | 1.024  | 0.346 | 0.658 | 0.239 | 0.527  | 0.087 | 1.401 | 0.738 |
| 7       | 0.864   | 0.057 | 0.813    | 0.059 | 2.379  | 0.766 | 1.218 | 0.073 | 0.735  | 0.148 | 1.106 | 0.246 |
| 8       | 1.796   | 0.060 | 1.117    | 0.099 | 1.728  | 0.413 | 1.263 | 0.337 | 1.065  | 0.376 | 0.760 | 0.131 |
| 9       | 0.269   | 0.037 | 0.594    | 0.040 | 0.654  | 0.133 | 0.632 | 0.017 | 0.920  | 0.132 | 0.975 | 0.526 |
| 10      | 0.922   | 0.149 | 0.994    | 0.231 | 0.607  | 0.336 | 1.236 | 0.316 | 0.876  | 0.085 | 0.875 | 0.599 |
| 11      | 1.390   | 0.099 | 1.176    | 0.131 | 1.137  | 0.155 | 0.734 | 0.143 | 1.593  | 0.147 | 1.075 | 0.546 |
| 12      | 0.484   | 0.042 | 1.093    | 0.057 | 0.718  | 0.154 | 1.198 | 0.430 | 0.843  | 0.166 | 1.557 | 0.548 |
| 13      | 0.271   | 0.021 | 0.433    | 0.026 | 0.344  | 0.076 | 0.552 | 0.095 | 0.926  | 0.195 | 1.029 | 0.435 |
| 14      | 6.140   | 1.020 | 4.457    | 0.926 | 6.878  | 1.400 | 2.066 | 0.272 | 3.671  | 0.422 | 1.028 | 0.366 |
| 15      | 0.673   | 0.042 | 0.596    | 0.133 | 0.335  | 0.148 | 0.743 | 0.172 | 3.377  | 0.647 | 0.895 | 0.330 |
| 16      | 0.434   | 0.016 | 0.554    | 0.058 | 0.931  | 0.108 | 0.797 | 0.111 | 0.762  | 0.130 | 1.046 | 0.385 |
| 17      | 0.551   | 0.008 | 0.420    | 0.168 | 0.630  | 0.118 | 0.708 | 0.225 | 0.517  | 0.062 | 0.982 | 0.402 |
| 18      | 1.078   | 0.130 | 1.846    | 0.227 | 2.606  | 0.787 | 1.389 | 0.327 | 4.383  | 0.477 | 0.813 | 0.453 |
| 19      | 0.295   | 0.033 | 0.742    | 0.189 | 0.306  | 0.163 | 0.967 | 0.209 | 0.935  | 0.084 | 1.018 | 0.720 |
| 20      | 0.794   | 0.036 | 0.609    | 0.056 | 0.704  | 0.221 | 0.672 | 0.065 | 1.259  | 0.201 | 0.956 | 0.378 |
| 21      | 1.103   | 0.107 | 2.215    | 0.018 | 1.862  | 0.204 | 1.612 | 0.236 | 1.638  | 0.158 | 1.030 | 0.353 |
| 22      | 3.489   | 0.211 | 12.523   | 1.473 | 3.428  | 1.486 | 2.833 | 1.440 | 1.741  | 0.160 | 1.471 | 0.593 |
| 23      | 1.111   | 0.091 | 1.340    | 0.171 | 1.377  | 0.671 | 1.137 | 0.212 | 0.599  | 0.234 | 1.095 | 0.240 |
| 24      | 0.156   | 0.021 | 0.467    | 0.042 | 0.660  | 0.141 | 0.785 | 0.042 | 0.660  | 0.135 | 0.817 | 0.396 |
| 25      | 2.965   | 0.115 | 3.685    | 0.326 | 6.644  | 1.418 | 5.156 | 0.506 | 0.698  | 0.147 | 0.773 | 0.245 |
| 26      | 1.581   | 0.193 | 1.006    | 0.294 | 1.212  | 0.118 | 1.846 | 0.303 | 1.131  | 0.341 | 0.736 | 0.454 |
| 27      | 1.198   | 0.061 | 0.907    | 0.136 | 0.976  | 0.289 | 1.000 | 0.082 | 1.797  | 0.612 | 1.295 | 0.806 |
| 28      | 1.228   | 0.076 | 1.117    | 0.076 | 0.464  | 0.089 | 0.871 | 0.070 | 1.315  | 0.283 | 0.860 | 0.576 |
| SNPC    | 1.281   | 0.027 | 2.700    | 0.330 | 2.075  | 0.332 | 1.826 | 0.701 | 3.937  | 0.623 | 1.897 | 0.396 |
| SNPT    | 1.158   | 0.047 | 3.160    | 0.130 | 4.122  | 0.981 | 2.013 | 0.259 | 10.677 | 1.220 | 1.769 | 0.522 |
